# Supplementary material
Source: PubMed Central journal article supplement (PMC7641302)
Supplement: gkaa438_supplemental_file.pdf [file gkaa438_supplemental_file.pdf]

## **Supplementary Material for**

### **Reconstitution of the Human tRNA Splicing Endonuclease Complex: insight into the regulation of pre-tRNA cleavage.**

Cassandra K. Hayne<sup>1</sup>, Casey A. Schmidt<sup>2</sup>, Maira I. Haque<sup>1,3</sup>, A. Gregory Matera<sup>2,4,5</sup>, and Robin E. Stanley<sup>1\*</sup>

<sup>1</sup>Signal Transduction Laboratory, National Institute of Environmental Health Sciences, National Institutes of Health, Department of Health and Human Services, 111 T. W. Alexander Drive, Research Triangle Park, NC 27709, USA

<sup>2</sup>Curriculum in Genetics & Molecular Biology and Integrative Program for Biological and Genome Sciences, University of North Carolina, Chapel Hill, NC 27599, USA.

<sup>3</sup>Department of Biology, North Carolina State University, Raleigh, NC 27695, USA.

<sup>4</sup>Departments of Biology and Genetics, University of North Carolina, Chapel Hill, NC 27599, USA.

<sup>5</sup>Lineberger Comprehensive Cancer Center, University of North Carolina, Chapel Hill, NC 27599, USA.

This PDF file includes:

Figure S1 to S6

Tables S1 to S5

Supplemental References

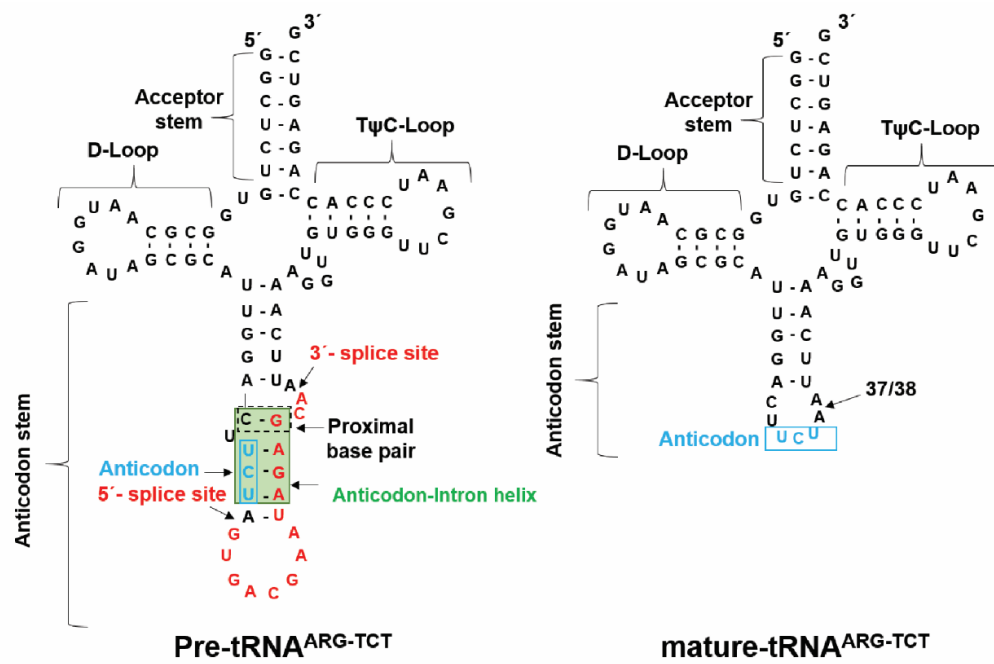

## tRNA-R1

**Figure S1. Human tRNA-R1 substrate used in this study.** Transfer RNA tRNA-R1 is shown here as pre-tRNA (left) and mature tRNA (right). Key regions of the tRNA are labelled.

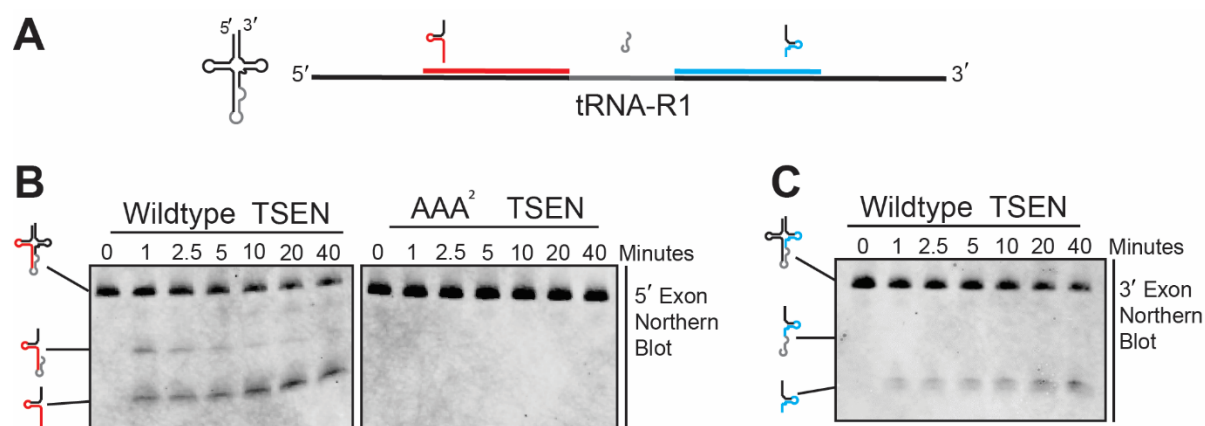

**Figure S2. Northern blot validation of time course experiments.** (A) Fluorescently labelled DNA oligos specific to tRNA-R1 were designed to bind to the 5' (red) or 3' (blue) exons in the regions flanking the intron. A time course of the human TSEN complex (1.5  $\mu$ M) cleaving tRNA-R1 (1.7  $\mu$ M) was performed, and samples were analyzed by Northern blotting. Northern blots to the 5' (B) and 3' (C) exons were performed.

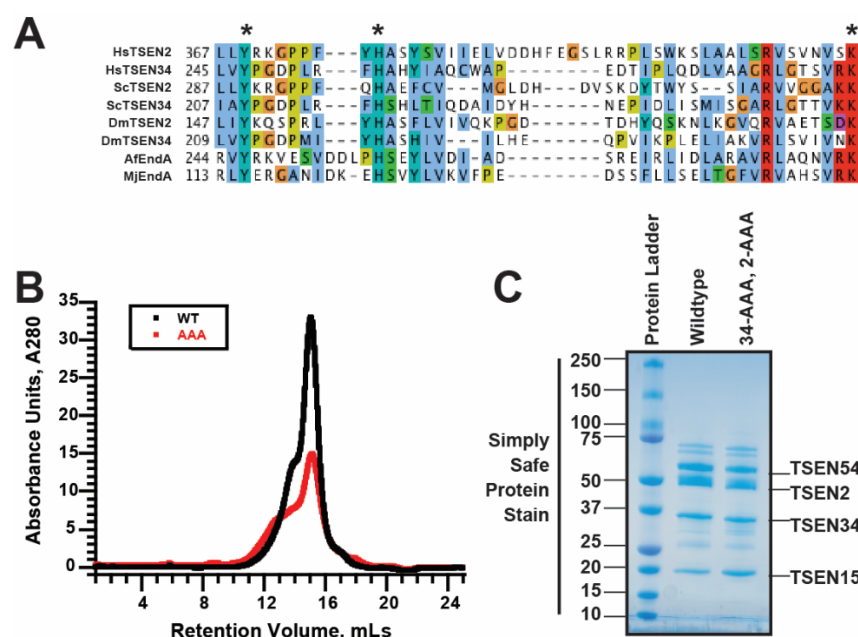

**Figure S3. Active site conservation of the TSEN endonucleases.** (A) A multiple sequence alignment of the active sites for the TSEN2 and TSEN34 endonuclease subunits from *Homo Sapiens* (Hs), *Saccharomyces Cerevisiae* (Sc), and *Drosophila Melanogaster* (Dm) shows the conservation of the active site with two archaea (*A.fulgidus* (Af) and *Methanococcus Jannaschii* (Mj)) endonucleases. (B) Superdex 200 10/300 Increase (GE Healthcare) gel filtration profiles of wildtype (black) and catalytic dead TSEN (red). (C) SDS-PAGE of 1.875  $\mu$ g of total protein of Wildtype and catalytic dead TSEN complexes concentrated from the gel filtration peak shown in B.

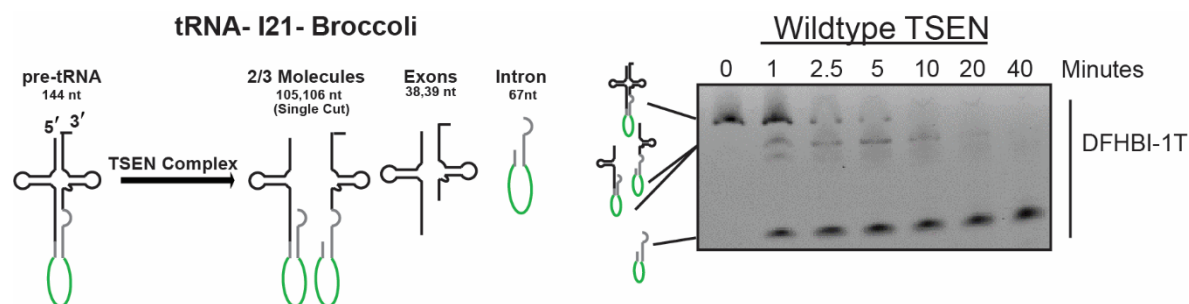

**Figure S4. RNA cleavage time course of tRNA substrate tRNA-I21-Broccoli by the human TSEN complex.** The *E. coli* recombinant TSEN complex efficiently cleaves the tRNA-I21 with a Broccoli RNA aptamer engineered into its native intron. A time course (0, 1, 2.5, 5, 10, 20, 40 minutes) is shown for the cleavage of the tRNA substrate by 1.5  $\mu$ M TSEN complex. RNA cleavage products were separated on a TBE-Urea gel, refolded in the gel, stained with 10  $\mu$ M DFHBI-1T, and Broccoli-containing RNA was visualized using a typhoon imager set to 488 nm.

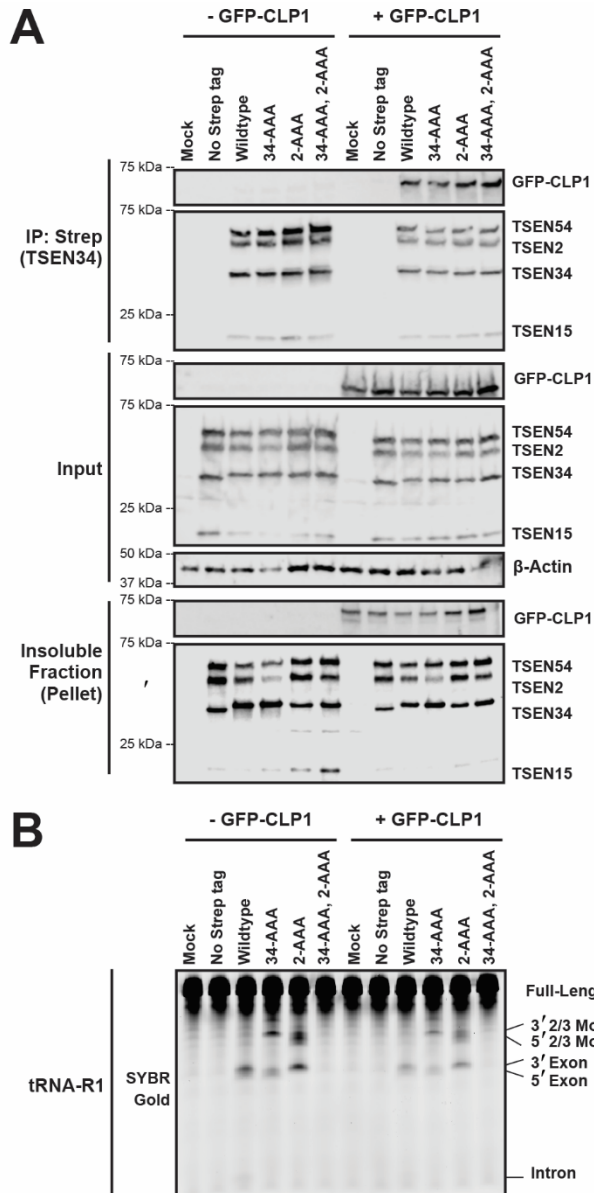

**Figure S5. Characterization of tRNA cleavage with TSEN34 and TSEN2 catalytic mutants**  
**(A)** HEK293 cells were transiently co-transfected with plasmids for FLAG-tagged TSEN subunit variants, including wild-type and endonuclease dead variants of TSEN2 and TSEN34. Samples were co-transfected with or without GFP-CLP1. Samples were immunoprecipitated using Anti-Strep resin to target Strep-FLAG-TSEN34. **(B)** Immunoprecipitated proteins were assayed for cleavage of tRNA-R1. Samples were analyzed by denaturing TBE-Urea gels stained with SYBR Gold to visualize all tRNA products.

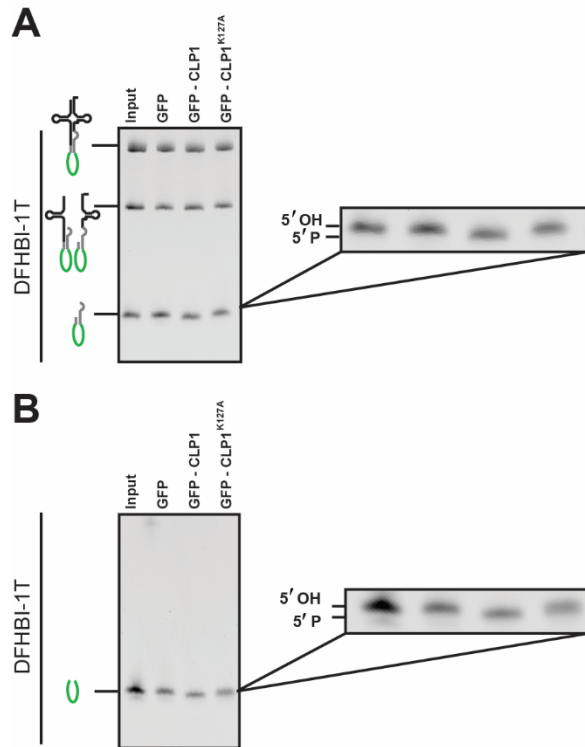

**Figure S6. Wildtype GFP-CLP1 isolated from HEK cells is active on RNA substrates.** HEK cells were transfected with GFP, GFP-CLP1, or GFP-CLP1 K127A. GFP immunoprecipitated complexes were assayed for kinase activity on both **(A)** tRNA-R1 containing broccoli in the intron was pre-cleaved by the *E. coli* TSEN complex and **(B)** purified broccoli RNA (synthesized by IDT). Samples were separated on a TBE-Urea gel and stained by DFHBI-1T to visualize broccoli-containing complexes.

**Table S1.** Plasmids used in this study.

| <b>Expression Plasmids used in this study</b>                                  |
|--------------------------------------------------------------------------------|
| pCDNA3.1-GFP-CLP1                                                              |
| pCDNA3.1-GFP-CLP1 (K127A)                                                      |
| pLexM--TSEN54                                                                  |
| pCDNA3.1-TSEN2-FLAG                                                            |
| pLexM-TSEN-FLAG                                                                |
| pLexM-TSEN2 (Y369A, H377A, K416A)-FLAG                                         |
| pCAG-OSF(OneStrepFLAG)-TSEN34                                                  |
| pCAG-OSF(OneStrepFLAG)-TSEN34 (Y247A, H255A, K286A)                            |
| pLexM-FLAG-TSEN34                                                              |
| pCDNA3.1-TSEN15-FLAG                                                           |
| pTric-U6-HsTyr-Broccoli (1)                                                    |
| pST39-TSEN34-TSEN54-TSEN2-TSEN15-HIS                                           |
| pST39-TSEN34(Y247A, H255A, K286A)-TSEN54-TSEN2(Y369A, H377A, K416A)-TSEN15-HIS |

**Table S2.** tRNA DNA templates for *in vitro* transcription. Constructs were cloned into pUC19 vectors using BamHI or EcoR1/EcoRV. Vectors are engineered as follows: *BamHI/EcoR1 site* -T7 promoter – 5' exon – intron (Broccoli) – 3' exon – *EcoRV site* (\*blunt cut site). The anticodon is shown in blue.

|                   |                                                                                                                                                                                                            |
|-------------------|------------------------------------------------------------------------------------------------------------------------------------------------------------------------------------------------------------|
| tRNA-R1           | GGATCCTAATACGACTCACTATAGGGGGCTCTGTGGCGCAATGGAT<br>AGCGCATTGGACTCTAAGTGACGAATAGAGCAATTCAAAGGTTGTG<br>GGTTCGAATCCCACCAGAGTCGGAT*ATC                                                                          |
| tRNA-I21-Broccoli | GAATTCGAGCTCGGTACCTAATACGACTCACTATAGGGGCTCCAGT<br>GGCGCAATCGGTTAGCGCGCGGTACTCTAAGACAGTGCAAGACG<br>GTCGGGTCCAGATATTGCTATCTGTGCGAGTAGAGTGTGGGCTCCTG<br>TGAGCAATGCCGAGGTTGTGAGTTCAAGCCTCACCTGGAGCAGAT*<br>ATC |

**Table S3.** Northern blot probes

|                       |                                 |
|-----------------------|---------------------------------|
| Dm - Dual reporter:   | TCCGAGCCGGAATCGAACCGG           |
| Dm - tric31905        | AAGCCTCGGAACTTTCAACATATCGC      |
| Dm - U1:              | GAATAATCGCAGAGGTCAACTCAGCCGAGGT |
| 5'- Exon (Hs-tRNA-R1) | TAGAAGTCCAATGCGCTATCC/3Cy3Sp/   |
| 3'- Exon (Hs-tRNA-R1) | TCGAACCCACAACCTTTGAAT/3Cy3Sp/   |

**Table S4.** Primers for dsRNA knockdowns.

|                                                        |                                                 |
|--------------------------------------------------------|-------------------------------------------------|
| cbc RNAi F:                                            | TAATACGACTCACTATAGGGTGAAGAAAAAGCAGTACGAGTTCGG   |
| cbc RNAi R:                                            | TAATACGACTCACTATAGGGGCTTGTTGCTATTTCAGAGATTGCAGT |
| Gaussia Luciferase (negative control) Neg ctrl RNAi F: | TAATACGACTCACTATAGGGTTCAACATCGTGGCCGTGGC        |
| Gaussia Luciferase (negative control) Neg ctrl RNAi R: | TAATACGACTCACTATAGGGGTTGGCAAGCCCTTTGAGGCA       |

**Table S5.** RT-PCR Primers.

|            |                         |
|------------|-------------------------|
| cbc RT F:  | CCAAAGTGCTGGTGTCCCTGG   |
| cbc RT R:  | GAGTACACAGCCCTGGTACGTG  |
| 5S rRNA F: | AACAACACGCGGTGTTCCCAAGC |
| 5S rRNA R: | GCCAACGACCATACCACGCTGAA |

### Supplemental References

1. Schmidt, C.A., Noto, J.J., Filonov, G.S. and Matera, A.G. (2016) A Method for Expressing and Imaging Abundant, Stable, Circular RNAs In Vivo Using tRNA Splicing. *Methods in enzymology*, **572**, 215-236.
